# Supplementary material
Source: publisher site journal article supplement (https://jamanetwork.com/journals/JAMA/articlepdf/2633917/joi170067supp1_prod.pdf)
Supplement: Supplementary file 1 [file joi170067supp1_prod.pdf]

## Supplementary Online Content

Wang L, Gao P, Zhang M, et al. Prevalence and ethnic pattern of diabetes and prediabetes in China in 2013. *JAMA*. doi:10.1001/jama.2017.7596

### **eAppendix Additional Information about the Hemoglobin A1c Assay Used**

|                 |                                                                                                                                            |
|-----------------|--------------------------------------------------------------------------------------------------------------------------------------------|
| <b>eTable 1</b> | <b>AAPOR outcome rate calculator (Panel of in-person household surveys)* .....</b>                                                         |
| <b>eTable 2</b> | <b>Numbers of participants, numbers of replacements and the replacement rates in each province.....</b>                                    |
| <b>eTable 3</b> | <b>Basic characteristics of participants included and excluded in the survey.....</b>                                                      |
| <b>eTable 4</b> | <b>Charateristics of treated patients with diabetes with and without adequate glycemic control .....</b>                                   |
| <b>eTable 5</b> | <b>Characteristics of participants by ethnic groups. ....</b>                                                                              |
| <b>eTable 6</b> | <b>ORs (95% CI) of ethnic groups for diabetes and prediabetes in the study set with complete information on all adjusted risk factors.</b> |

This supplementary material has been provided by the authors to give readers additional information about their work.

## eAppendix Additional Information about the Hemoglobin A1c Assay Used

Hemoglobin A1c was measured in a single laboratory for all participants, the Clinical Laboratory of the KingMed Center (Guangzhou, China). This laboratory has received consecutive certifications by the National Glycohemoglobin Standardization Program (NGSP, Level I Laboratory Certification). It is listed in the NGSP website which was updated in January 2017 (eFigure A1, full document can be found at <http://www.ngsp.org/docs/labs.pdf>). The Laboratory has regularly participated the proficiency-testing program and passed the College of American Pathologists (CAP)'s Laboratory Accreditation Program.

**List of NGSP Certified Laboratories (updated 01/17, listed by date certified)**

| Laboratory                                                                                        | Method/s                 | Certification Type  | Date Certified |
|---------------------------------------------------------------------------------------------------|--------------------------|---------------------|----------------|
| Q <sup>2</sup> Solutions (Pty.) Limited, a Quintiles Quest Joint Venture, Centurion, South Africa | Bio-Rad D-10             | Level I Laboratory  | May, 2016      |
| Laboratorio Médico Las Américas, Medellín-Antioquia, Colombia                                     | Abbott Architect c4000   | Level I Laboratory  | April, 2016    |
| Greenacres Chemistry, Port Elizabeth, South Africa                                                | Bio-Rad D-10             | Level II Laboratory | April, 2016    |
| Western Cape (NI City), Cape Town, South Africa                                                   | Bio-Rad Variant II       | Level II Laboratory | April, 2016    |
| Ampath Nelspruit, Nelspruit Mpumalanga, South Africa                                              | Bio-Rad D-10             | Level II Laboratory | April, 2016    |
| National University Hospital, Singapore                                                           | Bio-Rad Variant II Turbo | Level I Laboratory  | April, 2016    |
| Diagnosticos da America S/A (DASA), Barueri, Brazil                                               | Bio-Rad Variant II       | Level I Laboratory  | April, 2016    |
| Kingmed Center for Clinical Laboratory, Guangzhou, China                                          | Bio-Rad D-10             | Level I Laboratory  | April, 2016    |

**eFigure A1:** Relevant session in the List of NGSP Certified Laboratories from NGSP website

In our study, HbA<sub>1c</sub> was directly measured from a venous blood sample using quantitative high performance liquid chromatography and Boronate affinity method (Bio-Rad D-10™ Hemoglobin Analyzer). Venous blood samples were stored at -80°C until HbA<sub>1c</sub> was measured, which is within the range of the stability according to the manufacturer's instruction (i.e. ≤1 month). The Bio-Rad D-10 Hemoglobin Analyzer is

certified by the NGSP as traceable to the Diabetes Control and Complications Trial (DCCT) reference. This method has been used by many clinical trials and epidemiological studies.

Regular maintenance was performed every day during the period of measurement. Quality Control (QC) samples were applied before and after each batch of the HbA<sub>1c</sub> analyses, i.e. 100-150 samples per day. Calibration was applied when appropriate. Criteria for out-of-control (OOC) situations were flagged at QC rules 1–3s or 2–2s<sup>1</sup>. The precision of the Bio-Rad D-10™ Hemoglobin Analyzer was evaluated according to the Clinical & Laboratory Standards Institute (CLSI) guideline<sup>2</sup>. This method is also adapted by the NGSP for use in the certification of glycohemoglobin methods. The total imprecision, in terms of coefficients of variation (CVs) were 1.16% and 1.22% at HbA<sub>1c</sub> levels of 5.7% and 9.4% respectively in our study. The four technicians who performed the assay were all trained and had at least 4 years of experience in a medical laboratory (one had 15 years of experience). Technicians were blind to the survey information of each participant, including diabetes status of participants.

## References

1. CLSI/NCCLS C24-A3. *Statistical Quality Control for Quantitative Measurements: Principles and Definitions: Approved Guideline, 3rd edition*. Wayne, PA, USA: Clinical and Laboratory Standards Institute, 2006.
2. NCCLS. *Evaluation of Precision Performance of Quantitative Measurement Methods; Approved Guideline – Second Edition*. NCCLS document EP5-A2 [ISBN 1-56238-542-9]. NCCLS, Wayne, Pennsylvania USA, 2004.

**eTable 1 AAPOR outcome rate calculator (Panel of in-person household surveys)\***

|                                                                 | Final Disposition Codes | CCDRFS survey in 2013 |
|-----------------------------------------------------------------|-------------------------|-----------------------|
| <b>Interview (Category 1)</b>                                   |                         |                       |
| Complete (all versions)                                         | 1.0/1.10                | 179,347               |
| Partial (all versions)                                          | 1.2000                  | 1655                  |
| <b>Eligible, non-interview (Category 2)</b>                     |                         |                       |
| Refusal and breakoff (phone, IPHH, mail, mail_U)                | 2.1000                  | 2517                  |
| Refusal (phone, IPHH, mail, web)                                | 2.1100                  | 686                   |
| Household-level refusal (phone, IPHH, mail, web)                | 2.1110                  | 1910                  |
| Known-respondent refusal (phone, IPHH, mail, web)               | 2.1120                  | 121                   |
| Non-contact (phone, IPHH, mail, web, mail_U)                    | 2.2000                  | 3497                  |
| Respondent unavailable during field period (IPHH, mail, mail_U) | 2.2500                  | 2125                  |
| Other, non-refusals (phone, IPHH, mail, web, mail_U)            | 2.3000                  | 209                   |
| <b>Total sample used</b>                                        |                         |                       |
| I=Complete Interviews (1.1)                                     |                         | 179,347               |
| P=Partial Interviews (1.2)                                      |                         | 1655                  |
| R=Refusal and break off (2.1)                                   |                         | 5234                  |
| NC=Non Contact (2.2)                                            |                         | 5622                  |
| O=Other (2.0, 2.3)                                              |                         | 209                   |
| <b>Response Rate 1</b>                                          |                         |                       |
| $I/(I+P) + (R+NC+O) + (UH+UO)$                                  |                         | 0.934                 |
| <b>Response Rate 2</b>                                          |                         |                       |
| $(I+P)/(I+P) + (R+NC+O) + (UH+UO)$                              |                         | 0.942                 |
| <b>Response Rate 3</b>                                          |                         |                       |
| $I/((I+P) + (R+NC+O) + e(UH+UO) )$                              |                         | 0.934                 |
| <b>Response Rate 4</b>                                          |                         |                       |
| $(I+P)/((I+P) + (R+NC+O) + e(UH+UO) )$                          |                         | 0.942                 |
| <b>Cooperation Rate 1</b>                                       |                         |                       |
| $I/(I+P)+R+O)$                                                  |                         | 0.962                 |
| <b>Cooperation Rate 2</b>                                       |                         |                       |
| $(I+P)/((I+P)+R+O))$                                            |                         | 0.971                 |
| <b>Cooperation Rate 3</b>                                       |                         |                       |
| $I/((I+P)+R))$                                                  |                         | 0.963                 |
| <b>Cooperation Rate 4</b>                                       |                         |                       |
| $(I+P)/((I+P)+R))$                                              |                         | 0.972                 |

\* This standardized table to calculate response rates, cooperation rates and completion rates was developed by American Association for Public Opinion Research (AAPOR) and downloaded from [www.aapor.org](http://www.aapor.org), version 4, May 2016. Contents listed in the original table but not applicable for this survey were not listed.

**eTable 1 (continued) AAPOR response rate calculator (Panel of in-person household surveys)\***

|                                                  | <b>Final Disposition Codes</b> | <b>CCDRFS survey in 2013</b> |
|--------------------------------------------------|--------------------------------|------------------------------|
| <b>Refusal Rate 1</b>                            |                                |                              |
| $R / ((I+P) + (R+NC+O) + UH + UO)$               |                                | 0.027                        |
| <b>Refusal Rate 2</b>                            |                                |                              |
| $R / ((I+P) + (R+NC+O) + e(UH + UO))$            |                                | 0.027                        |
| <b>Refusal Rate 3</b>                            |                                |                              |
| $R / ((I+P) + (R+NC+O))$                         |                                | 0.027                        |
| <b>Contact Rate 1</b>                            |                                |                              |
| $(I+P) + R + O / (I+P) + R + O + NC + (UH + UO)$ |                                | 0.971                        |
| <b>Contact Rate 2</b>                            |                                |                              |
| $(I+P) + R + O / (I+P) + R + O + NC + e(UH+UO)$  |                                | 0.971                        |
| <b>Contact Rate 3</b>                            |                                |                              |
| $(I+P) + R + O / (I+P) + R + O + NC$             |                                | 0.971                        |

\* This standardized table to calculate response rates, cooperation rates and completion rates was developed by American Association for Public Opinion Research (AAPOR) and downloaded from [www.aapor.org](http://www.aapor.org), version 4, May 2016. Contents listed in the original table but not applicable for this survey were not listed.

**eTable 2 Numbers of participants, numbers of replacements and the replacement rates in each province**

|                     | No of participants | No. of replacement | Replacement rate (%) |
|---------------------|--------------------|--------------------|----------------------|
| <b>Overall</b>      | 170,287            | 10,642             | 6.25                 |
| <b>Beijing</b>      | 4057               | 284                | 7.00                 |
| <b>Tianjin</b>      | 3983               | 192                | 4.82                 |
| <b>Hebei</b>        | 7447               | 307                | 4.12                 |
| <b>Shanxi</b>       | 4648               | 248                | 5.34                 |
| <b>Neimenggu</b>    | 4654               | 96                 | 2.06                 |
| <b>Liaoning</b>     | 5669               | 919                | 16.21                |
| <b>Jilin</b>        | 4511               | 265                | 5.87                 |
| <b>Heilongjiang</b> | 5820               | 165                | 2.84                 |
| <b>Shanghai</b>     | 3961               | 271                | 6.84                 |
| <b>Jiangsu</b>      | 7675               | 361                | 4.70                 |
| <b>Zhejiang</b>     | 5833               | 455                | 7.80                 |
| <b>Anhui</b>        | 6998               | 295                | 4.22                 |
| <b>Fujian</b>       | 5821               | 528                | 9.07                 |
| <b>Jiangxi</b>      | 5868               | 123                | 2.10                 |
| <b>Shandong</b>     | 8149               | 315                | 3.87                 |
| <b>Henan</b>        | 8116               | 495                | 6.10                 |
| <b>Hubei</b>        | 5780               | 196                | 3.39                 |
| <b>Hunan</b>        | 7438               | 965                | 12.97                |
| <b>Guangdong</b>    | 8022               | 560                | 6.98                 |
| <b>Guangxi</b>      | 5863               | 491                | 8.37                 |
| <b>Hainan</b>       | 3363               | 118                | 3.51                 |
| <b>Chongqing</b>    | 5249               | 333                | 6.34                 |
| <b>Sichuan</b>      | 6921               | 291                | 4.20                 |
| <b>Guizhou</b>      | 4529               | 275                | 6.07                 |
| <b>Yunnan</b>       | 5770               | 500                | 8.67                 |
| <b>Xizang</b>       | 2427               | 99                 | 4.08                 |
| <b>Shaanxi</b>      | 5737               | 195                | 3.40                 |
| <b>Gansu</b>        | 4560               | 243                | 5.33                 |
| <b>Qinghai</b>      | 3437               | 740                | 21.53                |
| <b>Ningxia</b>      | 3418               | 149                | 4.36                 |
| <b>Xinjiang</b>     | 4563               | 168                | 3.68                 |

When the selected individual was not available (or refused to participant), a replacement was then chosen from all households of similar composition in the same neighbourhood or village after excluding the already selected households using the simple random sampling method. The replacements were used to ensure an adequate sample size within each selected community.

© 2017 American Medical Association. All rights reserved.

**eTable 3 Basic characteristics of participants included and excluded in the survey**

|                                          | Participants excluded<br>(N = 9060) |                        | Participants included<br>(N = 170,287) |                        |
|------------------------------------------|-------------------------------------|------------------------|----------------------------------------|------------------------|
|                                          | N                                   | Mean (SD)<br>or N(%) * | N                                      | Mean (SD)<br>or N(%) * |
| Age at survey (years)                    | 9060                                | 50.0 (15.0)            | 170,287                                | 51.6 (14.2)            |
| Sex (Male)                               | 9060                                | 4021(44.4%<br>)        | 170,287                                | 72736(42.7%<br>)       |
| BMI (kg/m <sup>2</sup> )                 | 7416                                | 24.4 (3.61)            | 170,287                                | 24.3 (3.63)            |
| SBP (mmHg)                               | 7729                                | 130.1<br>(20.2)        | 170,104                                | 131.5 (20.9)           |
| Smoking status (Current)                 | 9040                                | 1890<br>(20.9%)        | 170,189                                | 41515<br>(24.4%)       |
| Education (Junior High School or higher) | 9039                                | 5013<br>(55.5%)        | 170,188                                | 88034<br>(51.7%)       |
| Physical activity (MET-mins/week)        | 9025                                | 4473<br>(6023)         | 170,228                                | 5731 (6672)            |

Abbreviations: BMI: body mass index; SBP: systolic blood pressure; MET: Metabolic equivalent.

\* Statistics were unweighted estimations.

**eTable 4 Characteristics of treated patients with diabetes with and without adequate glycemic control**

|                                          | Patients with adequate glycemic control |                      | Patients without adequate glycemic control |                      | P values |
|------------------------------------------|-----------------------------------------|----------------------|--------------------------------------------|----------------------|----------|
|                                          | N                                       | Mean (SD) or N (%) * | N                                          | Mean (SD) or N (%) * |          |
| Age at survey (years)                    | 4515                                    | 59.8(11.5)           | 4480                                       | 58.9(11.0)           | <0.001   |
| BMI (kg/m <sup>2</sup> )                 | 4515                                    | 25.7(3.5)            | 4480                                       | 25.7(3.6)            | 1.00     |
| Obesity (BMI≥30 kg/m <sup>2</sup> )      | 4515                                    | 484(10.7%)           | 4480                                       | 519(11.6%)           | 0.19     |
| SBP (mmHg)                               | 4511                                    | 140.6(21.0)          | 4474                                       | 142.9(22.0)          | <0.001   |
| Smoking status (Current)                 | 4512                                    | 785(17.4%)           | 4480                                       | 891(19.9%)           | 0.002    |
| Education (Junior High School or higher) | 4512                                    | 2548(56.5%)          | 4480                                       | 2227(49.7%)          | <0.001   |
| Physical activity(MET-mins/week)         | 4512                                    | 3855(4651)           | 4478                                       | 4188(4825)           | 0.001    |
| Alcohol (Never)                          | 4515                                    | 3418(75.7%)          | 4480                                       | 3447(76.9%)          | 0.17     |
| Meat (g/d)                               | 4422                                    | 107.1(125.6)         | 4372                                       | 104.9(128.4)         | 0.42     |
| Vegetables (g/d)                         | 4390                                    | 353.6(229.5)         | 4340                                       | 350.0(222.6)         | 0.46     |
| Fruit (g/d)                              | 4451                                    | 88.1(131.1)          | 4407                                       | 71.8(117.0)          | <0.001   |
| Treatments                               |                                         |                      |                                            |                      |          |
| Oral                                     | 4515                                    | 3581(79.3%)          | 4480                                       | 3557(79.4%)          | 0.92     |
| Insulin                                  | 4515                                    | 703(15.6%)           | 4480                                       | 1168(26.1%)          | <0.001   |
| Lifestyle change (sport or diet)         | 4515                                    | 2047(45.3%)          | 4480                                       | 1882(42.0%)          | 0.001    |
| Glucose monitor                          | 4515                                    | 1142(25.3%)          | 4480                                       | 1048(23.4%)          | 0.04     |
| FPG (mg/dL)                              | 4498                                    | 122.5(28.8)          | 4464                                       | 191.0(64.9)          | <0.001   |
| HbA <sub>1c</sub> (%)                    | 4515                                    | 6.0(0.6)             | 4480                                       | 8.7(1.6)             | <0.001   |

Abbreviations: BMI: body mass index; SBP: systolic blood pressure; MET: Metabolic equivalent; FPG: fasting plasma glucose; HbA<sub>1c</sub>: hemoglobin A1c.

\* Statistics were unweighted estimations.



**eTable 5 Characteristics of participants by ethnic groups**

|                                     | Mean (SD) or N (%) * |                     |                    |                    |                    |                    |
|-------------------------------------|----------------------|---------------------|--------------------|--------------------|--------------------|--------------------|
|                                     | Han<br>(N=150,766)   | Tibetan<br>(N=3103) | Zhuang<br>(N=2081) | Manchu<br>(N=2106) | Muslim<br>(N=2085) | Uyghur<br>(N=1929) |
| Age at survey (years)               | 52.0(14.1)           | 44.2(12.1)          | 53.2(13.8)         | 50.3(13.3)         | 48.6(14.3)         | 46.1(15.4)         |
| Sex (Male)                          | 64,012(42.5%)        | 1328(42.8%)         | 798(38.3%)         | 893(42.4%)         | 990(47.5%)         | 1029(53.3%)        |
| BMI (kg/m <sup>2</sup> )            | 24.4(3.6)            | 23.5(3.8)           | 23.0(3.5)          | 24.7(3.6)          | 24.8(3.6)          | 25.3(4.4)          |
| SBP (mmHg)                          | 131.8(20.9)          | 128.9(20.4)         | 129.1(21.2)        | 135.3(21.6)        | 128.1(20.1)        | 123.4(20.4)        |
| Smoking status (Current)            | 37,058(24.6%)        | 613(20.0%)          | 420(20.2%)         | 600(28.5%)         | 355(17.0%)         | 232(12.0%)         |
| Physical activity (MET-min/week)    | 5558(6553)           | 6680(7239)          | 7323(7777)         | 5342(6755)         | 5679(5763)         | 6297(6790)         |
| Obesity (BMI≥30 kg/m <sup>2</sup> ) | 10,135(6.7%)         | 201(6.5%)           | 71(3.4%)           | 150(7.1%)          | 172(8.2%)          | 268(13.9%)         |
| Alcohol (Never)                     | 101,982(67.6%)       | 1569(50.6%)         | 1444(69.4%)        | 1419(67.4%)        | 1772(85.0%)        | 1843(95.5%)        |
| Meat (g/day) <sup>&amp;</sup>       | 75.5(31.9,144.0)     | 125.0(58.6,228.6)   | 158.3(85.2,245.7)  | 55.0(24.3,95.7)    | 49.9(17.6,112.4)   | 57.2(28.2,150.0)   |
| Vegetables (g/d) <sup>&amp;</sup>   | 300.0(200.0,500.0)   | 150.0(64.3,300.0)   | 300.0(200.0,450.0) | 250.0(150.0,400.0) | 212.5(100.0,400.0) | 200.0(100.0,400.0) |
| Fruit (g/d) <sup>&amp;</sup>        | 50.0(14.3,142.9)     | 25.0(6.7,64.3)      | 42.9(15.0,100.0)   | 42.9(14.3,100.0)   | 57.1(14.3,150.0)   | 100.0(50.0,375.0)  |
| Total cholesterol (mg/dL)           | 186.9(39.6)          | 178.8(36.3)         | 192.7(39.9)        | 190.0(39.5)        | 170.5(39.6)        | 163.5(35.5)        |
| HDL cholesterol (mg/dL)             | 52.7(15.1)           | 56.9(15.2)          | 55.7(16.0)         | 53.8(15.0)         | 47.6(12.8)         | 43.5(10.7)         |
| FPG (mg/dL)                         | 102.7(28.8)          | 91.9(18.0)          | 102.7(28.8)        | 106.3(30.6)        | 100.9(27.0)        | 95.5(32.4)         |
| 2h PG (mg/dL)                       | 118.9(46.8)          | 100.9(37.8)         | 120.7(48.6)        | 117.1(50.5)        | 113.5(41.4)        | 108.1(43.2)        |
| HbA <sub>1c</sub> (%)               | 5.5(0.9)             | 5.4(0.7)            | 5.4(1.0)           | 5.5(0.9)           | 5.3(0.9)           | 5.6(1.1)           |

Abbreviations: BMI: body mass index; SBP: systolic blood pressure; MET: Metabolic equivalent; FPG: fasting plasma glucose; 2h PG: 2-hour plasma glucose; HbA<sub>1c</sub>: hemoglobin A1c.

\* Statistics were unweighted estimations. <sup>&</sup> Median (25<sup>th</sup> – 75<sup>th</sup>) was provided.

**eTable 6 ORs (95% CI) of ethnic groups for diabetes and prediabetes in the study set with complete information on all adjusted risk factors**

|                                                    | OR (95% CI), Chinese Han as the reference |                     |                      |                      |                      |
|----------------------------------------------------|-------------------------------------------|---------------------|----------------------|----------------------|----------------------|
|                                                    | Tibetan<br>(N = 2803)                     | Zhung<br>(N = 1911) | Manchu<br>(N = 1858) | Uyghur<br>(N = 1676) | Muslim<br>(N = 1954) |
| <b>Diabetes (155,844 participants in total)</b>    |                                           |                     |                      |                      |                      |
| Model 1                                            | 0.27(0.22,0.32)                           | 0.78(0.68,0.90)     | 1.00(0.87,1.14)      | 0.82(0.71,0.95)      | 0.67(0.58,0.78)      |
| Model 2                                            | 0.36(0.30,0.43)                           | 0.76(0.66,0.88)     | 1.07(0.94,1.22)      | 1.03(0.88,1.19)      | 0.75(0.65,0.87)      |
| Model 3                                            | 0.39(0.32,0.47)                           | 0.92(0.80,1.06)     | 1.10(0.96,1.26)      | 1.14(0.97,1.33)      | 0.73(0.63,0.85)      |
| Model 4                                            | 0.41(0.34,0.49)                           | 0.93(0.81,1.08)     | 1.09(0.95,1.25)      | 1.15(0.99,1.35)      | 0.74(0.63,0.86)      |
| Model 5                                            | 0.42(0.35,0.50)                           | 0.91(0.78,1.05)     | 1.09(0.95,1.25)      | 1.08(0.93,1.27)      | 0.73(0.63,0.85)      |
| <b>Prediabetes (155,844 participants in total)</b> |                                           |                     |                      |                      |                      |
| Model 1                                            | 0.71(0.65,0.77)                           | 1.14(1.04,1.25)     | 1.16(1.05,1.27)      | 1.09(0.99,1.20)      | 0.74(0.67,0.82)      |
| Model 2                                            | 0.81(0.74,0.88)                           | 1.12(1.07,1.18)     | 1.19(1.08,1.31)      | 1.23(1.11,1.36)      | 0.79(0.72,0.87)      |
| Model 3                                            | 0.80(0.74,0.87)                           | 1.17(1.06,1.28)     | 1.14(1.04,1.25)      | 1.21(1.10,1.34)      | 0.78(0.71,0.86)      |
| Model 4                                            | 0.77(0.71,0.84)                           | 1.16(1.06,1.27)     | 1.14(1.04,1.26)      | 1.20(1.08,1.32)      | 0.77(0.70,0.85)      |
| Model 5                                            | 0.77(0.71,0.84)                           | 1.14(1.04,1.25)     | 1.14(1.04,1.25)      | 1.23(1.11,1.36)      | 0.78(0.71,0.86)      |

Model 1: unadjusted.

Model 2: adjusted for age and sex.

Model 3: adjusted for age, sex, smoking status, systolic blood pressure, body mass index, location.

Model 4: adjusted for age, sex, smoking status, systolic blood pressure, body mass index, location, education, physical activity.

Model 5: adjusted for age, sex, smoking status, systolic blood pressure, body mass index, location, education, physical activity, total cholesterol, and HDL cholesterol.

ORs of minority ethnic groups were calculated using multivariable logistic regression. Ethnic group was defined as a 7-category variable in the model. Seven categories were defined as Chinese Han (reference), Tibetan, Zhuang, Manchu, Muslim, Uyghur and others. 155,844 participants in total for the analysis was the number of participants used in the logistic regression including all 7 categories of the participants.
